# Supplementary material
Source: PubMed Central journal article supplement (PMC2791692)
Supplement: NIHMS159376-supplement-SupData.pdf [file NIHMS159376-supplement-SupData.pdf]

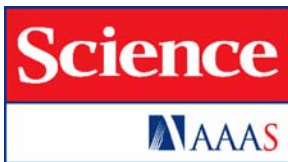

Supporting Online Material for  
**Regulation of CD45 Alternative Splicing by  
Heterogeneous Ribonucleoprotein, HnRNPLL**

Shalini Oberdoerffer, Luis Ferreira Moita, Daniel Neems,  
Rui P. Freitas, Nir Hacohen, Anjana Rao\*

\*To whom correspondence should be addressed. E-mail: [arao@ibi.harvard.edu](mailto:arao@ibi.harvard.edu)

Published 10 July 2008 on *Science* Express  
DOI: 10.1126/science.1157610

**This PDF file includes:**

Materials and Methods  
SOM Text  
Figs. S1 to S4  
Tables S1 to S4  
References

## Supporting Online Material

### Materials and Methods

#### Virus production

By rearraying LKO.1 shRNA constructs supplied as glycerol stocks by the RNAi Consortium (TRC), Broad Institute (1), we generated a human lentiviral shRNA library directed against splicing regulators. Minipreps and virus production were performed as described in the TRC online protocols.

#### Cell Culture

JSL1 cells were maintained in 5% FCS, 1% L-glutamine RPMI. BJAB and BL41 cells were maintained in 10% FCS, 1% L-glutamine RPMI.

#### Cloning

HnRNPL and hnRNPLL cDNA (Open Biosystems) were cloned into an IRES-GFP containing lentiviral vector (gift from B. North) or pMSCV-puro FLAG (Clontech). The empty constructs and hnRNP encoding constructs were transfected into 293T cells along with VSV-G and gag/pol encoding constructs to produce virus.

#### Cell line Infection and Flow Cytometry

**Screen:** JSL1 cells were plated in 96 well round-bottom plates at 10,000 cells per well. 5 ul of virus plus 8 ug/ml polybrene was added per well and the plates were spun at 2250 rpm for 90 minutes. The supernatants were removed and fresh media was added. Puromycin was added at a final concentration of 5 ug/ml on day 2. PMA was added at a final concentration of 10 nM on day 8. Cells were stained with CD45RO-APC antibody (custom-made BD-Pharmingen) and fixed with 2% formaldehyde on day 10. Flow cytometry was performed on a FACScalibur (Becton Dickinson). A candidate gene was defined as a hit if two or more shRNAs increased or decreased CD45RO expression, in duplicate, by more than one standard deviation from the mean (Tables S1, S2). Most of the hits produced moderate variations from the mean on a log scale (Fig. S1a), but hnRNPLL knockdown had a striking effect (Fig. 1C).

**Secondary:** JSL1, BL41 and BJAB cells were infected with hnRNPLL or hnRNPL knockdown and expression viruses.  $5 \times 10^5$  cells were plated in 125 ul media plus 25 ul virus and a final concentration of 8 ug/ml polybrene in a 24 well plate. Cells were spun at 2250 rpm for 90 minutes and the media was replaced with fresh media. 5 ug/ml puromycin was added on day 2 and the cultures were expanded in puromycin containing medium. The cells were stained for cell-surface CD45 isoform expression approximately two weeks later with CD45RO-APC (custom-made BD-Pharmingen) or CD45RA-PE (Ebioscience) antibody and flow cytometry was performed on a FACScalibur.

#### Quantitative RT-PCR

RNA was isolated with the Qiagen RNeasy Mini Kit and reverse transcription was performed with SuperScript II (Invitrogen) according to the manufacturer's directions. PCR was performed in the presence of SYBR green reagent (Applied Biosystems) and amplification was performed on an iCycler (BioRad). Cycle thresholds were normalized to GAPDH levels and fold enrichments were set to the normalized uninfected or unstimulated value where applicable.

## **Western Blots**

Cells were lysed in RIPA buffer (50mM Tris, pH 8, 150 mM NaCl, 1% NP40, 0.1% SDS, 0.5% sodium deoxycholate, protease inhibitors). 50 ug of protein was loaded for anti-hnRNPL blots and 15 ug for anti-hnRNPL blots per lane on a 12.5% SDS-PAGE gel. Western Blot was performed with anti-hnRNPL (Aviva Biosystems), anti-hnRNPL antibodies (Aviva Biosystems), or anti-p65 RelA (Santa Cruz) antibodies. Anti-RelA immunoblotting served as a loading control for the Western blots.

## **Immunoprecipitation**

Cells were lysed in 1% NP-40 lysis buffer (150mM Tris, pH 7.4, 150 mM NaCl, 1% NP40, 10% glycerol, 2mM EDTA, 2mM EGTA, protease inhibitors). 500 ug of total lysate was loaded onto anti-Flag-M2 agarose beads (Sigma) in a 1 ml volume. The immunoprecipitations were incubated at 4°C overnight. After washing in 1xTBS, samples were eluted by boiling at 95°C for 5 minutes in 1x Laemmli loading buffer. The immunoprecipitated samples and 5% inputs were resolved on a 12.5% acrylamide gel. Western blot was performed with anti-hnRNPL antibody (Aviva Biosystems).

## **Primary Cell Isolation and Infection**

Peripheral blood lymphocytes were purified by spinning through a Ficoll gradient (Sigma). Isolated cells were washed twice with PBS and naïve CD4+ T cells were isolated by negative depletion (Dyna). The cells were plated in the presence of 20 U/ml IL-2 at 20,000 per well in 96 well flat-bottom plates that had been pre-coated with 2.5 ug/ml anti-CD3/anti-CD28. After 24 hours in culture, 20 ul of concentrated virus was added and the cells were spin infected at 2250 rpm for 90 minutes. The virus was removed and fresh media plus 20 U/ml IL-2 was added. 2.5 ug/ml puromycin was added to the LKO.1 transduced wells 24 hours later. Fresh media plus IL-2 was added every 2-3 days. Triplicate wells were counted to assess proliferation. Surface receptor staining was performed with CD45RO-APC (custom-made BD-Pharmingen), CD45RA-FITC (Ebioscience), and CD25-PE (Ebioscience) antibody and flow cytometry was performed on a FACScalibur. IRES-GFP- hnRNPL transduced cells were analyzed on day 5 post-isolation. Knockdown cells were analyzed on day 7 post-isolation.

## **RNA-Immunoprecipitation**

Cells were lysed in 1% NP-40 lysis buffer (150mM Tris, pH 7.4, 150 mM NaCl, 1% NP40, 10% glycerol, 2mM EDTA, 2mM EGTA, protease inhibitors). 2.7 mg of total lysate was loaded onto protein-A sepharose beads coupled to anti-FLAG-M2 (Sigma) and the volume was adjusted to 1 ml in lysis buffer including RNase-Out (2.5 U/ml), VRC (420 uM) and 20 mM EDTA. The immunoprecipitation reactions were incubated at 4°C for four hours and then washed in 1ml of cold lysis buffer. After adding an equal volume of lysis buffer, the samples were eluted at 50°C for 30 minutes. The beads were resuspended in Tri-reagent (Ambion) and total RNA and protein were isolated by ethanol and acetone precipitation, respectively. These protein fractions as well as 5% inputs from the initial lysates were loaded onto a 12.5% acrylamide gel for Western blot analysis. The RNA fractions were resuspended in 10 ul of poly-A tailing reaction mix (Ambion) and reverse transcription was performed with a mixture of random hexamers and oligo-dT (Ambion). PCR was performed on an iCycler (Bio-Rad) in the presence of SYBR green (Applied Biosystems) with primers that encompass CD45 exon 4 ESS1 (F-5'-GCAAAGATGCCAGTGTTCCACTT-3', R-5'-TTCTCTTTCAAAGGTGCTTGCGGG-3'). Since pre-mRNA splicing occurs co-transcriptionally (2) and exons 4-6 are excluded from mature

CD45 transcripts in hnRNPLL-expressing cells, we chose PCR primers that bind within exon 4 to ensure accurate detection of the predicted targets of hnRNPLL rather than choosing primers that span separate exons in the unspliced precursor or the excised region. Cycle thresholds were normalized to CD45 transcript expression in total RNA isolated from 5% of the input fraction. The resulting values plotted in Fig. 3 thus represent 1/20<sup>th</sup> the pool of total CD45 transcripts.

### Exon Array Analysis

RNA was isolated from 1) cord blood CD4+ T cells, 2) cord blood cells that had been activated with anti-CD3/anti-CD28 for 24 hours, 3) activated CD4+ peripheral T cells, 4) peripheral T cells infected with an shRNA directed against hnRNPLL and 5) peripheral T cells infected with an shRNA directed against GFP (as described above) with Qiagen RNeasy columns. The RNA was hybridized to Affymetrix human 1.0 ST exon arrays and the resulting CEL files were analyzed with XRAY<sup>TM</sup> software (Biotique Systems). Transcripts showing statistically-significant alternative exon expression ( $p < 0.01$ ) without a large change in overall gene expression were identified. To reduce false positives, exons that fell below a threshold for hybridization were excluded from the analysis, leading to analysis of ~7000 genes in each of the pairwise comparisons.

### Supporting Figures

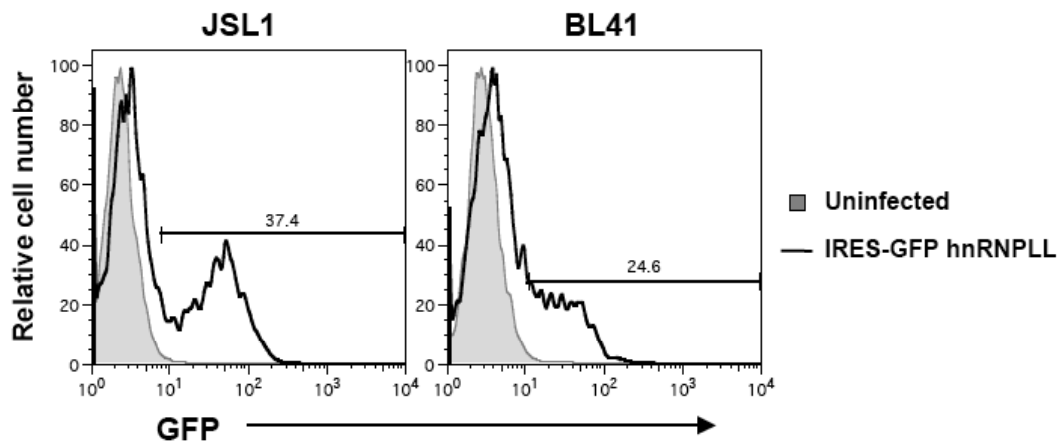

**Fig. S1.** JSL1 and BL41 cells were lentivirally transduced with a bicistronic vector encoding GFP and hnRNPLL. Transduction efficiency was determined by assessing GFP expression by flow cytometry. Approximately 35% of JSL1 and 25% of BL41 cells were successfully transduced.

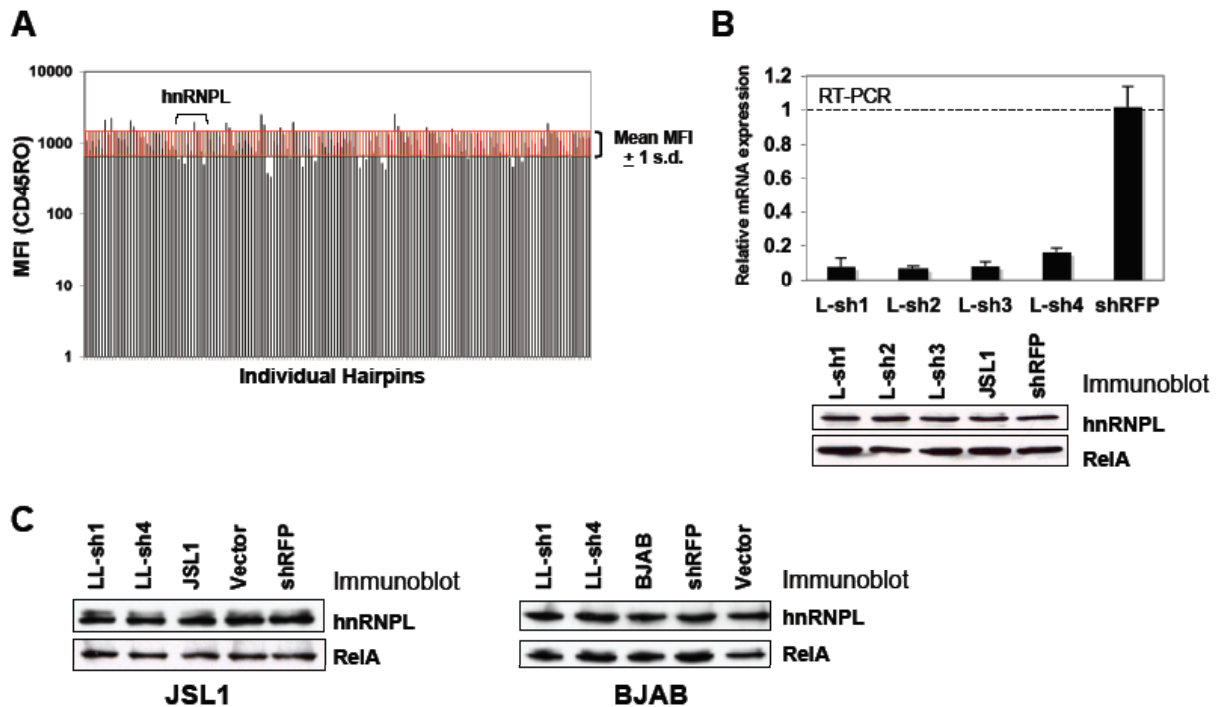

**Fig. S2.** HnRNPL knockdown was ineffective in JSL1 cells. **(A)** JSL1 cells were transduced with lentiviral shRNAs, PMA stimulated and stained for CD45RO cell surface expression in 96 well plate format. The mean fluorescence intensities (MFIs) of CD45RO expression for the individual hairpins in duplicate were plotted on a log scale. Data from a single 96-well plate are shown. One standard deviation from the mean is indicated in red. HnRNPL did not meet the criteria of being identified as a hit in our screen. **(B)** JSL1 cells stably expressing shRNAs directed against hnRNPL were produced. (top) Quantitative RT-PCR indicated that all four hairpins effectively knocked down hnRNPL transcripts. (bottom) Western blot with anti-hnRNPL antibody showed that in spite of reduced transcript expression, hnRNPL was not depleted at the protein level. **(C)** HnRNPL expression in JSL1 cells stably expressing shRNAs directed against hnRNP LL was determined by Western blot. HnRNPL expression was not altered by knockdown of hnRNPLL in JSL1 and BJAB cells.

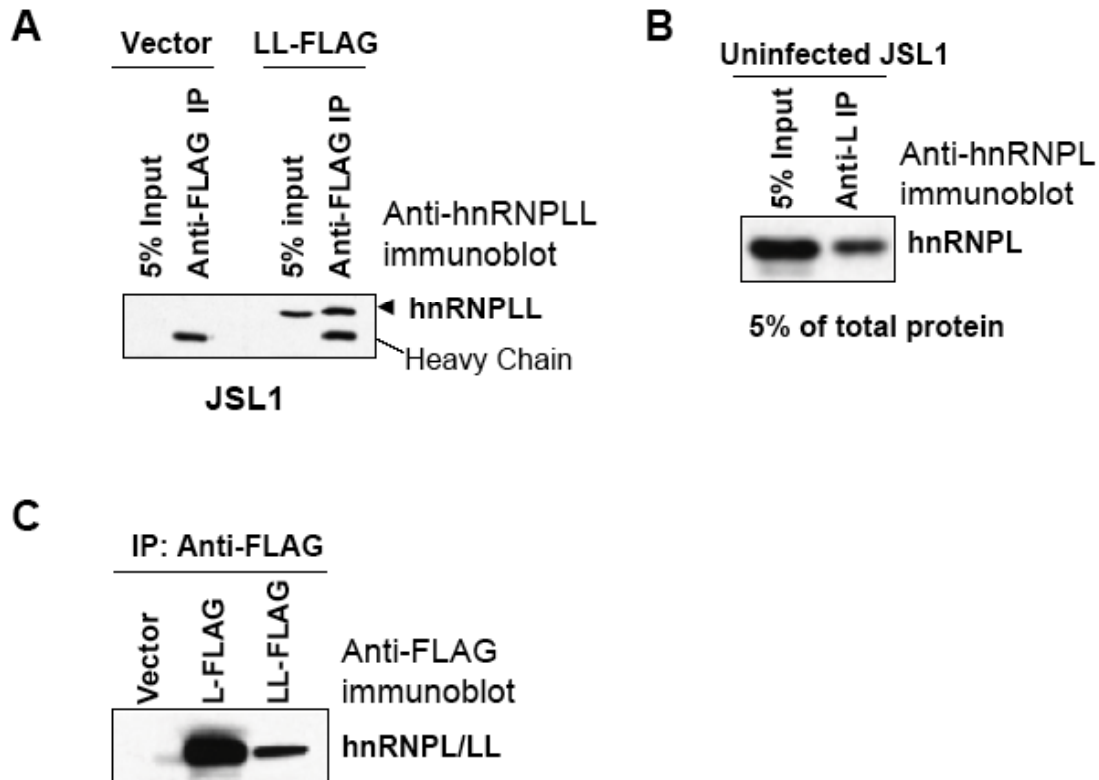

**Fig. S3.** Immunoprecipitation of hnRNPL and hnRNPLL from JSL1 cell lysates. **(A)** FLAG-tagged hnRNPLL (LL-FLAG) was immunoprecipitated from JSL1 cells with anti-FLAG antibody in the presence of RNase inhibitors. RNA was isolated for quantitative RT-PCR (Fig. 3E). Anti-hnRNPLL immunoblot of the protein fraction verified immunoprecipitation. HnRNPLL was detected in the 5% input and the immunoprecipitated fraction (IP) from JSL1 cells stably expressing LL-FLAG, but not in vector-transduced cells. **(B)** Endogenous hnRNPL was immunoprecipitated from JSL1 cells with anti-hnRNPL antibody in the presence of RNase inhibitors. RNA was isolated for quantitative RT-PCR (Fig. 3E). Anti-hnRNPL immunoblot of the protein fraction verified hnRNPL expression in the 5% inputs and in the immunoprecipitated sample. Given the high level of hnRNPL expression in the input and immunoprecipitated samples, only 5% of the total protein in each fraction was used for SDS-PAGE analysis. **(C)** FLAG-tagged hnRNPL (L-FLAG) or LL-FLAG were immunoprecipitated from stably expressing JSL1 cells. Western blot for FLAG protein indicated that L-FLAG was stably expressed at a higher level than LL-FLAG.

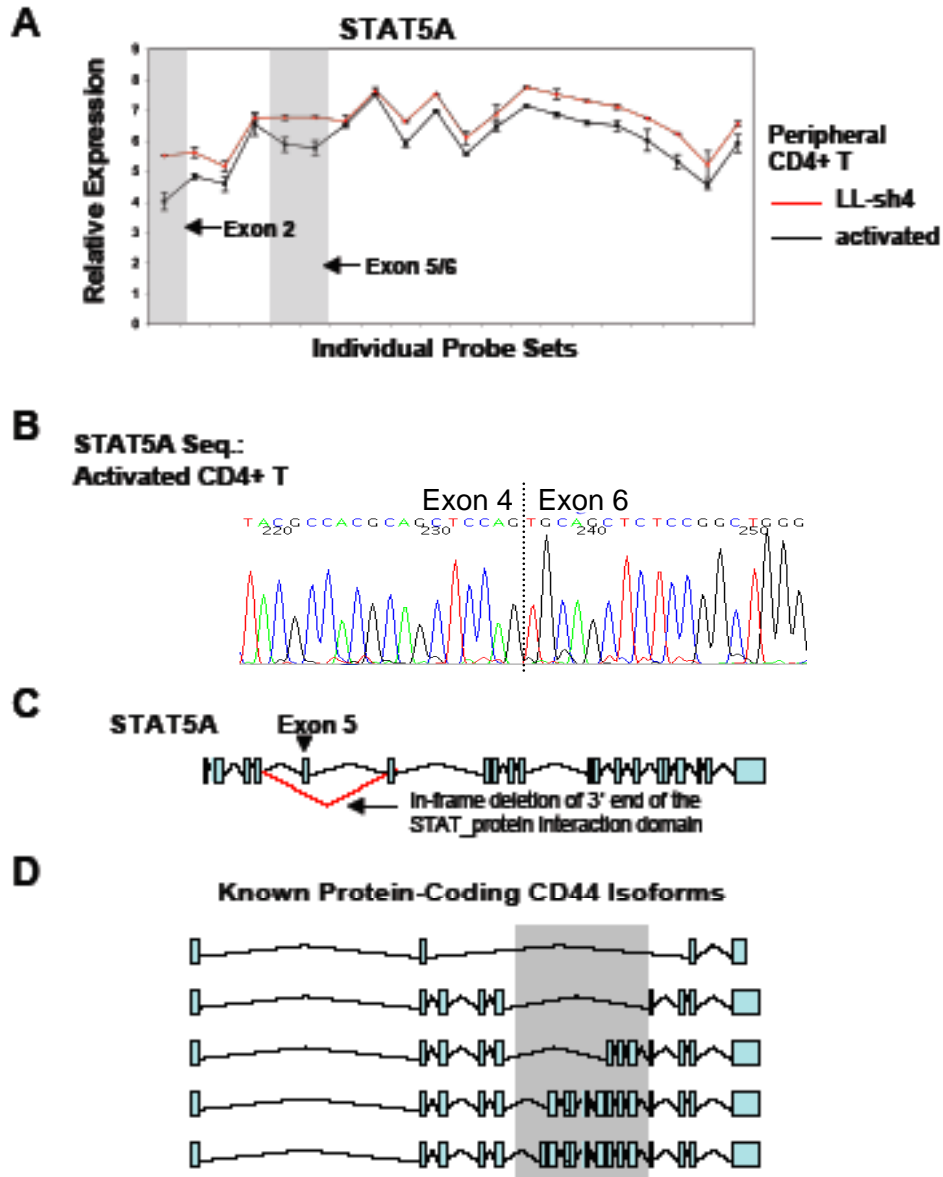

**Fig. S4.** Exon array isoform predictions. (A) Expression of STAT5A exons 2, 5 and 6 increases following hnRNPLL depletion (GEO Accession GSE11834). (B) Loss of STAT5A exon 5 was confirmed by RT-PCR and sequencing (direct splicing of exons 4 and 6). (C) Resulting transcripts would result in an in-frame deletion of the C-terminal part of the STAT<sub>protein</sub> interaction domain. This domain is known to influence dimerization. (D) CD44 exons 6 through 14 undergo extensive alternative splicing to generate a number of protein coding isoforms.

## Supporting Tables

**Table S1.** Hits with > 1 Standard Deviation Increase in CD45RO Expression (Negative Regulators)

| Gene     | Full Name/Function                                            |
|----------|---------------------------------------------------------------|
| EWSR1    | Ewing Sarcoma Breakpoint Region 1                             |
| SF3B1    | Splicing Factor, Component of U2                              |
| SRRM1    | serine/arginine repetitive matrix 1                           |
| CPSF1    | Cleavage and polyadenylation factor                           |
| SDCCAG10 | serologically defined colon cancer antigen 10                 |
| PRPF4B   | Precursor mRNA-processing factor 4                            |
| SNW1     | SKI-interacting protein (SKIIP)                               |
| U2AF2    | U2AF65                                                        |
| CRK7     | Cdc2-related kinase with RS domain                            |
| FUBP1    | Far Upstream Element-Binding Protein 1                        |
| VIM      | intermediate filament subunit specific for mesenchymal cells  |
| TPR      | Translocated Promoter Region                                  |
| ELAVL3   | Embryonic Lethal, Abnormal Vision, Drosophila, Homolog-Like 3 |
| NUMA1    | Nuclear Mitotic Apparatus Protein 1                           |
| PRPF38B  | Pre-mRNA processing factor                                    |
| SNRPD2   | Small Nuclear Ribonucleoprotein Polypeptide D2                |
| BRUNOL5  | Bruno-like 5, RNA binding protein                             |
| WBP11    | WW domain-binding protein 11                                  |
| MORG1    | Mitogen-activated protein kinase organizer 1                  |
| PCBP2    | Poly(rC)-binding protein 2 (Alpha-CP2) (hnRNP-E2)             |
| PRPF3    | PRP3 pre-mRNA processing factor 3 homolog                     |
| CDC5L    | Cell division cycle 5-like protein                            |
| HNRPCL1  | heterogeneous nuclear ribonucleoprotein C-like 1V             |
| CTNBL1   | catenin, beta like 1                                          |

**Table S2.** Hits with >1 Standard Deviation Decrease in CD45RO Expression (Positive Regulators)

| Gene   | Full Name/Function                                        |
|--------|-----------------------------------------------------------|
| SFPQ   | Splicing Factor, Proline- and Glutamine-rich              |
| HNRPD  | Heterogeneous Nuclear Ribonucleoprotein D                 |
| SAFB   | Scaffold Attachment Factor B                              |
| EE1AF1 | Eukaryotic Translation Elongation Factor 1                |
| DDX1   | DEAD/H box RNA helicase                                   |
| FIP1L1 | FIP1-Like 1, resembles FIP1- involved in poly-A synthesis |
| BUB3   | Budding Uninhibited by Benzimidazoles 3                   |



|        |                                                |
|--------|------------------------------------------------|
| PABPC4 | Poly(A) Binding Protein, Cytoplasmic 4         |
| PRCC   | Papillary renal cell carcinoma                 |
| HNRPLL | Heterogeneous nuclear ribonucleoprotein L-like |

**Table S3.** Genes displaying significant alternative exon usage in response to hnRNP LL knockdown in peripheral CD4+ T cells, but not in response to infection with an shRNA directed against GFP, as assessed by exon array analysis ( $p < 0.01$ ).

| Gene      | Gene-Annotation                                                    | Alternative Exon Use (p-value) |
|-----------|--------------------------------------------------------------------|--------------------------------|
| ADAM15    | ADAM metalloproteinase domain 15 (metargidin)                      | 2.91E-15                       |
| PTPRC     | protein tyrosine phosphatase receptor type C                       | 3.73E-15                       |
| WAC       | WW domain containing adaptor with coiled-coil                      | 4.39E-09                       |
| IL4I1     | interleukin 4 induced 1                                            | 9.99E-09                       |
| HIST1H2BJ | histone cluster 1 H2bj                                             | 6.63E-08                       |
| COL1A1    | collagen type I alpha 1                                            | 1.93E-07                       |
| CD44      | CD44 molecule (Indian blood group)                                 | 4.60E-07                       |
| RAD54B    | RAD54 homolog B ( <i>S. cerevisiae</i> )                           | 7.65E-07                       |
| HIST1H1C  | histone cluster 1 H1c                                              | 2.60E-06                       |
| STAT5A    | signal transducer and activator of transcription 5A                | 3.28E-06                       |
| SCD       | stearoyl-CoA desaturase (delta-9-desaturase)                       | 3.87E-06                       |
| SNRPA1    | small nuclear ribonucleoprotein polypeptide A'                     | 4.66E-06                       |
| ARHGEF3   | Rho guanine nucleotide exchange factor (GEF) 3                     | 5.31E-06                       |
| ARHGEF18  | rho/rac guanine nucleotide exchange factor (GEF) 18                | 6.68E-06                       |
| CD53      | CD53 molecule                                                      | 8.65E-06                       |
| REXO1     | REX1 RNA exonuclease 1 homolog ( <i>S. cerevisiae</i> )            | 2.70E-05                       |
| HNRPLL    | heterogeneous nuclear ribonucleoprotein L-like                     | 5.06E-05                       |
| SNORA18   | small nucleolar RNA H/ACA box 18                                   | 5.70E-05                       |
| HIST1H2AC | histone cluster 1 H2ac                                             | 6.03E-05                       |
| CHID1     | chitinase domain containing 1                                      | 1.01E-04                       |
| CFLAR     | CASP8 and FADD-like apoptosis regulator                            | 1.02E-04                       |
| TXNDC5    | thioredoxin domain containing 5                                    | 1.28E-04                       |
| FASN      | fatty acid synthase                                                | 1.39E-04                       |
| USP36     | ubiquitin specific peptidase 36                                    | 1.48E-04                       |
| PDE4A     | phosphodiesterase 4A cAMP-specific                                 | 2.10E-04                       |
| PARG      | poly (ADP-ribose) glycohydrolase                                   | 2.14E-04                       |
| MKI67     | antigen identified by monoclonal antibody Ki-67                    | 2.33E-04                       |
| NAB1      | NGFI-A binding protein 1 (EGR1 binding protein 1)                  | 2.73E-04                       |
| POLQ      | polymerase (DNA directed) theta                                    | 2.87E-04                       |
| SMG6      | Smg-6 homolog nonsense mediated mRNA decay factor                  | 2.94E-04                       |
| EIF3S7    | eukaryotic translation initiation factor 3 subunit 7 zeta 66/67kDa | 3.22E-04                       |
| CCDC125   | coiled-coil domain containing 125                                  | 3.43E-04                       |
| DUSP4     | dual specificity phosphatase 4                                     | 3.88E-04                       |
| MT1H      | metallothionein 1H                                                 | 4.06E-04                       |
| PXDNL     | peroxidase homolog ( <i>Drosophila</i> )-like                      | 4.11E-04                       |
| TBL1XR1   | transducin (beta)-like 1X-linked receptor 1                        | 4.12E-04                       |
| CD3D      | CD3d molecule delta (CD3-TCR complex)                              | 4.59E-04                       |
| FXR2      | fragile X mental retardation autosomal homolog 2                   | 4.79E-04                       |
| PTPN2     | protein tyrosine phosphatase non-receptor type 2                   | 6.36E-04                       |

|          |                                                                                         |          |
|----------|-----------------------------------------------------------------------------------------|----------|
| TMEM29   | transmembrane protein 29                                                                | 7.06E-04 |
| CLK2     | CDC-like kinase 2                                                                       | 7.32E-04 |
| EIF4G3   | eukaryotic translation initiation factor 4 gamma 3                                      | 7.32E-04 |
| C16orf68 | chromosome 16 open reading frame 68                                                     | 7.36E-04 |
| HSPA14   | heat shock 70kDa protein 14                                                             | 7.43E-04 |
| HPCAL1   | hippocalcin-like 1                                                                      | 1.04E-03 |
| IFRD1    | interferon-related developmental regulator 1                                            | 1.09E-03 |
| GSTM2    | glutathione S-transferase M2 (muscle)                                                   | 1.24E-03 |
| DUSP2    | dual specificity phosphatase 2                                                          | 1.29E-03 |
| TRAF1    | TNF receptor-associated factor 1                                                        | 1.32E-03 |
| YWHAZ    | tyrosine 3-monooxygenase/tryptophan 5-monooxygenase activation protein zeta polypeptide | 1.36E-03 |
| BCR      | breakpoint cluster region                                                               | 1.47E-03 |
| C11orf59 | chromosome 11 open reading frame 59                                                     | 1.59E-03 |
| YRDC     | yrdC domain containing (E. coli)                                                        | 1.62E-03 |
| SPRYD3   | SPRY domain containing 3                                                                | 1.82E-03 |
| PPP1CB   | protein phosphatase 1 catalytic subunit beta isoform                                    | 1.84E-03 |
| LATS1    | LATS large tumor suppressor homolog 1 (Drosophila)                                      | 1.85E-03 |
| STARD4   | START domain containing 4 sterol regulated                                              | 2.22E-03 |
| CHORDC1  | cysteine and histidine-rich domain (CHORD)-containing 1                                 | 2.25E-03 |
| RBM14    | RNA binding motif protein 14                                                            | 2.38E-03 |
| PIK3IP1  | phosphoinositide-3-kinase interacting protein 1                                         | 2.40E-03 |
| CD2      | CD2 molecule                                                                            | 2.46E-03 |
| NEIL3    | nei endonuclease VIII-like 3 (E. coli)                                                  | 2.49E-03 |
| CASC5    | cancer susceptibility candidate 5                                                       | 2.51E-03 |
| EIF2B5   | eukaryotic translation initiation factor 2B subunit 5 epsilon 82kDa                     | 2.53E-03 |
| C19orf48 | chromosome 19 open reading frame 48                                                     | 2.68E-03 |
| CD80     | CD80 molecule                                                                           | 2.76E-03 |
| GPR114   | G protein-coupled receptor 114                                                          | 2.85E-03 |
| BPNT1    | 3'(2') 5'-bisphosphate nucleotidase 1                                                   | 2.91E-03 |
| ZBTB7A   | zinc finger and BTB domain containing 7A                                                | 3.09E-03 |
| SEC31B   | SEC31 homolog B (S. cerevisiae)                                                         | 3.12E-03 |
| TUBA1B   | tubulin alpha 1b                                                                        | 3.29E-03 |
| ARL17    | ADP-ribosylation factor-like 17                                                         | 3.30E-03 |
| CENPF    | centromere protein F 350/400ka (mitosin)                                                | 3.41E-03 |
| CXorf40A | chromosome X open reading frame 40A                                                     | 3.79E-03 |
| SIRT5    | sirtuin (silent mating type information regulation 2 homolog) 5                         | 3.95E-03 |
| ATAD5    | ATPase family AAA domain containing 5                                                   | 4.05E-03 |
| WDR62    | WD repeat domain 62                                                                     | 4.12E-03 |
| C6orf167 | chromosome 6 open reading frame 167                                                     | 4.13E-03 |
| DCLRE1B  | DNA cross-link repair 1B (PSO2 homolog S. cerevisiae)                                   | 4.16E-03 |
| LEPROT   | leptin receptor overlapping transcript                                                  | 4.23E-03 |
| TMEM29   | transmembrane protein 29                                                                | 4.34E-03 |
| TFE3     | transcription factor binding to IGHM enhancer 3                                         | 4.44E-03 |
| CG018    | hypothetical gene CG018                                                                 | 4.55E-03 |
| NAP1L1   | nucleosome assembly protein 1-like 1                                                    | 4.64E-03 |
| WDR3     | WD repeat domain 3                                                                      | 4.64E-03 |
| DCC1     | defective in sister chromatid cohesion homolog 1 (S. cerevisiae)                        | 4.69E-03 |
| TTC9C    | tetratricopeptide repeat domain 9C                                                      | 4.73E-03 |
| ALG11    | asparagine-linked glycosylation 11                                                      | 4.76E-03 |
| EMR2     | egf-like module containing mucin-like hormone receptor-like 2                           | 4.76E-03 |

|             |                                                                      |          |
|-------------|----------------------------------------------------------------------|----------|
| PPAN-P2RY11 | PPAN-P2RY11                                                          | 4.82E-03 |
| HEXIM1      | hexamethylene bis-acetamide inducible 1                              | 4.85E-03 |
| SPATS2      | spermatogenesis associated serine-rich 2                             | 4.91E-03 |
| HNRPK       | heterogeneous nuclear ribonucleoprotein K                            | 5.01E-03 |
| FTL         | ferritin light polypeptide                                           | 5.06E-03 |
| L3MBTL3     | l(3)mbt-like 3 (Drosophila)                                          | 5.17E-03 |
| KIF15       | kinesin family member 15                                             | 5.23E-03 |
| MYST4       | MYST histone acetyltransferase (monocytic leukemia) 4                | 5.24E-03 |
| XBP1        | X-box binding protein 1                                              | 5.41E-03 |
| ZNF592      | zinc finger protein 592                                              | 5.42E-03 |
| SCP2        | sterol carrier protein 2                                             | 5.60E-03 |
| CD96        | CD96 molecule                                                        | 5.73E-03 |
| CLSTN1      | calsyntenin 1                                                        | 6.01E-03 |
| NUPL1       | nucleoporin like 1                                                   | 6.03E-03 |
| TRIP10      | thyroid hormone receptor interactor 10                               | 6.03E-03 |
| MAP3K12     | mitogen-activated protein kinase kinase kinase 12                    | 6.08E-03 |
| EPHX1       | epoxide hydrolase 1 microsomal (xenobiotic)                          | 6.13E-03 |
| FBXW7       | F-box and WD repeat domain containing 7                              | 6.42E-03 |
| U2AF1L4     | U2 small nuclear RNA auxiliary factor 1-like 4                       | 6.43E-03 |
| C1orf58     | chromosome 1 open reading frame 58                                   | 6.44E-03 |
| RUNX3       | runt-related transcription factor 3                                  | 6.47E-03 |
| AURKB       | aurora kinase B                                                      | 6.65E-03 |
| LYCAT       | lysocardiolipin acyltransferase                                      | 6.90E-03 |
| USP20       | ubiquitin specific peptidase 20                                      | 7.23E-03 |
| FANCA       | Fanconi anemia complementation group A                               | 7.56E-03 |
| SC5DL       | sterol-C5-desaturase                                                 | 7.64E-03 |
| GSG2        | germ cell associated 2 (haspin)                                      | 7.91E-03 |
| PRKY        | protein kinase Y-linked                                              | 8.09E-03 |
| CDCP1       | CUB domain containing protein 1                                      | 8.14E-03 |
| CALM1       | calmodulin 1 (phosphorylase kinase delta)                            | 8.29E-03 |
| TCOF1       | Treacher Collins-Franceschetti syndrome 1                            | 8.38E-03 |
| CCL3        | chemokine (C-C motif) ligand 3                                       | 8.52E-03 |
| C12orf10    | chromosome 12 open reading frame 10                                  | 8.72E-03 |
| TNFSF8      | tumor necrosis factor (ligand) superfamily member 8                  | 8.79E-03 |
| NUDCD1      | NudC domain containing 1                                             | 8.99E-03 |
| SYPL1       | synaptophysin-like 1                                                 | 9.25E-03 |
| P4HA2       | proline 4-hydroxylase alpha polypeptide II                           | 9.34E-03 |
| AAAS        | achalasia adrenocortical insufficiency alacrimia (Allgrove triple-A) | 9.42E-03 |
| SBNO2       | strawberry notch homolog 2 (Drosophila)                              | 9.43E-03 |
| ZNF398      | zinc finger protein 398                                              | 9.62E-03 |
| BIN1        | bridging integrator 1                                                | 9.65E-03 |
| CEP27       | centrosomal protein 27kDa                                            | 9.70E-03 |
| ZAK         | sterile alpha motif and leucine zipper containing kinase AZK         | 9.71E-03 |

**Table S4.** Genes displaying significant alternative exon usage in response to hnRNPLL knockdown in peripheral CD4+ T cells and in response to activation of cord blood CD4+ T cells, but not in response to shGFP infection of peripheral CD4+ T cells, as assessed by exon array analysis ( $p < 0.01$ ).

| Gene    | Gene Annotation                                                                         | Alternative Exon Use (p-value) |
|---------|-----------------------------------------------------------------------------------------|--------------------------------|
| PTPRC   | protein tyrosine phosphatase receptor type C                                            | 3.73E-15                       |
| WAC     | WW domain containing adaptor with coiled-coil                                           | 4.39E-09                       |
| CD44    | CD44 molecule (Indian blood group)                                                      | 4.60E-07                       |
| RAD54B  | RAD54 homolog B ( <i>S. cerevisiae</i> )                                                | 7.65E-07                       |
| STAT5A  | signal transducer and activator of transcription 5A                                     | 3.28E-06                       |
| SCD     | stearoyl-CoA desaturase (delta-9-desaturase)                                            | 3.87E-06                       |
| SNRPA1  | small nuclear ribonucleoprotein polypeptide A'                                          | 4.66E-06                       |
| SNORA18 | small nucleolar RNA H/ACA box 18                                                        | 5.70E-05                       |
| CFLAR   | CASP8 and FADD-like apoptosis regulator                                                 | 1.02E-04                       |
| TXNDC5  | thioredoxin domain containing 5                                                         | 1.28E-04                       |
| FASN    | fatty acid synthase                                                                     | 1.39E-04                       |
| PARG    | poly (ADP-ribose) glycohydrolase                                                        | 2.14E-04                       |
| EIF3S7  | eukaryotic translation initiation factor 3 subunit 7 zeta 66/67kDa                      | 3.22E-04                       |
| PXDNL   | peroxidasin homolog ( <i>Drosophila</i> )-like                                          | 4.11E-04                       |
| EIF4G3  | eukaryotic translation initiation factor 4 gamma 3                                      | 7.32E-04                       |
| HSPA14  | heat shock 70kDa protein 14                                                             | 7.43E-04                       |
| GSTM2   | glutathione S-transferase M2 (muscle)                                                   | 1.24E-03                       |
| DUSP2   | dual specificity phosphatase 2                                                          | 1.29E-03                       |
| TRAF1   | TNF receptor-associated factor 1                                                        | 1.32E-03                       |
| YWHAZ   | tyrosine 3-monooxygenase/tryptophan 5-monooxygenase activation protein zeta polypeptide | 1.36E-03                       |
| CHORDC1 | cysteine and histidine-rich domain (CHORD)-containing 1                                 | 2.25E-03                       |
| RBM14   | RNA binding motif protein 14                                                            | 2.38E-03                       |
| TUBA1B  | tubulin alpha 1b                                                                        | 3.29E-03                       |
| ARL17   | ADP-ribosylation factor-like 17                                                         | 3.30E-03                       |
| SIRT5   | sirtuin (silent mating type information regulation 2 homolog) 5                         | 3.95E-03                       |
| TFE3    | transcription factor binding to IGHM enhancer 3                                         | 4.44E-03                       |
| NAP1L1  | nucleosome assembly protein 1-like 1                                                    | 4.64E-03                       |
| ALG11   | asparagine-linked glycosylation 11 homolog                                              | 4.76E-03                       |
| EMR2    | egf-like module containing mucin-like hormone receptor-like 2                           | 4.76E-03                       |

|             |                                                       |          |
|-------------|-------------------------------------------------------|----------|
| PPAN-P2RY11 | PPAN-P2RY11                                           | 4.82E-03 |
| MYST4       | MYST histone acetyltransferase (monocytic leukemia) 4 | 5.24E-03 |
| CD96        | CD96 molecule                                         | 5.73E-03 |
| RUNX3       | runt-related transcription factor 3                   | 6.47E-03 |
| USP20       | ubiquitin specific peptidase 20                       | 7.23E-03 |
| C12orf10    | chromosome 12 open reading frame 10                   | 8.72E-03 |
| TNSF8       | tumor necrosis factor (ligand) superfamily member 8   | 8.79E-03 |

## Supplementary Discussion

By using mouse models with conditional expression or deletion of hnRNPLL, the global program of hnRNPLL-mediated alternative splicing may be investigated in different cell types. For instance, B cells express high levels of B220 (CD45ABC) from the pro-B cell until the plasma cell stage, at which point they begin to express both CD45RO (3) and hnRNPLL (GEO profiles). The same strategy may be used to address some long-standing questions about the specific roles of long and CD45 isoforms in lymphocyte signaling (4-6). Assigning specific functions to the isoforms has been difficult since the expression level of CD45 is a critical parameter in its function (7, 8), yet basal CD45 expression is very high (3, 4, 6). Furthermore, even the short CD45 isoforms present in activated T cells appear to be excluded from TCR microclusters (9), potentially explaining why the activating effects of CD45 tend to predominate over its inhibitory effects (3, 4). Genetic manipulation of hnRNP expression, through its global effects on CD45 isoform expression, will facilitate our understanding of CD45 alternative splicing in a physiological context.

## Supplementary References

1. J. Moffat *et al.*, *Cell* **124**, 1283 (Mar 24, 2006).
2. T. Maniatis, R. Reed, *Nature* **416**, 499 (Apr 4, 2002).
3. M. L. Hermiston, Z. Xu, A. Weiss, *Annu Rev Immunol* **21**, 107 (2003).
4. N. Holmes, *Immunology* **117**, 145 (Feb, 2006).
5. K. W. Lynch, *Nat Rev Immunol* **4**, 931 (Dec, 2004).
6. I. S. Trowbridge, M. L. Thomas, *Annu Rev Immunol* **12**, 85 (1994).
7. R. J. Salmond, L. McNeill, N. Holmes, D. R. Alexander, *Int Immunol* (Apr 30, 2008).
8. L. McNeill *et al.*, *Immunity* **27**, 425 (Sep, 2007).
9. R. Varma, G. Campi, T. Yokosuka, T. Saito, M. L. Dustin, *Immunity* **25**, 117 (Jul, 2006).
